# Supplementary material
Source: HighWire-hosted journal article supplement (http://www.ajnr.org/highwire/filestream/52464/field_highwire_adjunct_files/0/3618_tables.pdf)
Supplement: 3618_tables.pdf [file 3618_tables.pdf]

**On-line Table 1: Individual patient and ISCM characteristics**

| Patient | Age | Sex | Primary Neoplasm    | Days PET-MRI <sup>a</sup> | ISCM on Clinical PET |                | MRI      |          | PET         | SUVmax |             |
|---------|-----|-----|---------------------|---------------------------|----------------------|----------------|----------|----------|-------------|--------|-------------|
|         |     |     |                     |                           | Report               | ISCM on Review | Location | Size, mm | Location    | ISCM   | Mediastinum |
| 1       | 64  | F   | Melanoma            | -21                       | No                   | No             | C7-T1    | 10       |             |        |             |
| 2       | 57  | F   | Melanoma            | -49                       | No                   | Yes            | L1-4     | 114      | T12/L1-L3/4 | 5.4    | 1.8         |
| 3       | 69  | M   | Melanoma            | -7                        | No                   | No             | T7       | 5        |             |        |             |
| 4       | 55  | M   | Melanoma            | 0                         | No                   | Yes            | T12-L1   | 21       | T12-L1      | 9.0    | 1.8         |
| 5       | 73  | M   | Non-small cell lung | -5                        | Yes                  | Yes            | C2       | 11       | C1-2        | 9.9    | 1.8         |
|         |     |     |                     |                           | Yes                  | Yes            | T4       | 11       | T4          | 9.8    | 1.8         |
|         |     |     |                     |                           | Yes                  | Yes            | T4-5     | 17       | T5          | 7.5    | 1.8         |
|         |     |     |                     |                           | Yes                  | Yes            | T11      | 18       | T10         | 5.3    | 1.8         |
| 6       | 75  | F   | Non-small cell lung | -7                        | No                   | No             | T8       | 3        |             |        |             |
| 7       | 37  | F   | Melanoma            | 0                         | Yes                  | Yes            | C3-4     | 12       | C3-4        | 7.7    | 2.3         |
| 8       | 69  | F   | Non-small cell lung | 13                        | Equivocal            | Yes            | C1-5     | 58       | C2-3        | 5.1    | 2.6         |
| 9       | 54  | F   | Non-small cell lung | -1                        | No                   | Yes            | C3       | 7        | C3-4        | 3.3    | 1.7         |
| 10      | 55  | M   | Small-cell lung     | 7                         | No                   | Yes            | T9-11    | 52       | T10-11      | 4.4    | 2.5         |

<sup>a</sup> PET exams performed before MRI are indicated with -.

**On-line Table 2: Group patient and ISCM characteristics**

|                                                                      | All Patients (n = 10 Patients, 13 ISCMs) | ISCM Visible on PET Review (n = 7 Patients, 10 ISCMs) | ISCM Not Visible on PET Review (n = 3 Patients, 3 ISCMs) | P Value: ISCM Visibility on PET |
|----------------------------------------------------------------------|------------------------------------------|-------------------------------------------------------|----------------------------------------------------------|---------------------------------|
| Days between PET and MRI, mean, range; -PET before +PET after        | 11, -49 to +13                           | 11, -49 to +13                                        | 12, -21 to -7                                            | .7                              |
| Length of CE ISCM on MRI, mm; mean, range                            | 26.1, 3-114                              | 32.1, 7-114                                           | 6.0, 3-10                                                | .038                            |
| Length of CE ISCM on MRI, No. of segments; mean, range               | 1.5, 1-4                                 | 1.6, 1-4                                              | 1.0, 1-1                                                 | .11                             |
| Length of T2 signal abnormality on MRI, No. of segments; mean, range | 4.5, 1-13                                | 5.6, 2-13                                             | 1.0, 1-1                                                 | .0081                           |
| Ratio: segment length T2 signal abnormality to CE, mean, range       | 3.2, 1-10                                | 3.8, 1-10                                             | 1.0, 1-1                                                 | .0069                           |
| Length of ISCM on PET, No. of segments; mean, range                  | -                                        | 1.3, 1-3                                              | -                                                        |                                 |
| Morphology of PET uptake                                             |                                          |                                                       |                                                          |                                 |
| Fusiform, n (%)                                                      | -                                        | 2/10 (20%)                                            | -                                                        |                                 |
| Round, n (%)                                                         | -                                        | 8/10 (80%)                                            | -                                                        |                                 |
| SUVmax ISCM, mean, range                                             | -                                        | 6.7, 3.3-9.9                                          | -                                                        |                                 |
| Clinical PET report diagnosed ISCM? n (%)                            |                                          |                                                       |                                                          |                                 |
| No, n (%)                                                            | 7/13 (53.8%)                             | 4/10 (40%)                                            | -                                                        |                                 |
| Yes, n (%)                                                           | 5/13 (38.5%)                             | 5/10 (50%)                                            | -                                                        |                                 |
| Equivocal, n (%)                                                     | 1/13 (7.7%)                              | 1/10 (10%)                                            | -                                                        |                                 |
| Primary neoplasm on PET report, n (%)                                | 4/10 (40%)                               | 3/7 (42.8%)                                           | 1/3 (33.3%)                                              |                                 |
| Other metastases on PET report, n (%)                                | 9/10 (90%)                               | 6/7 (85.7%)                                           | 3/3 (100%)                                               |                                 |
| Non-CNS, nonspine metastases on PET report, n (%)                    | 7/10 (70%)                               | 4/7 (57.1%)                                           | 3/3 (100%)                                               |                                 |
| Other CNS metastases on PET report, n (%)                            | 2/10 (20%)                               | 2/7 (28.6%)                                           | 0/3 (0%)                                                 |                                 |
| Spinal column skeletal metastases on PET report, n (%)               | 1/10 (10%)                               | 1/7 (14.3%)                                           | 0/3 (0%)                                                 |                                 |

**Note:**—CE indicates contrast enhancing.
